# Supplementary material for: Mechanically enhanced healable and recyclable silicone with dynamic hindered urea bond for flexible electronics
Source: Royal Society of Chemistry journal article supplement (doi:10.1039/d1tc01273h), 2021-01-01
Supplement: d1tc01273h1.pdf [file d1tc01273h1.pdf]

## Supporting Information

### Mechanically enhanced healable and recyclable silicone with dynamic hindered urea bond for flexible electronics

Wenjie Sun, Lei Zhang\*, Shuang Wang, Jiale Mao, Jiaming Luo, Yu Chen,

Yonghong Cheng\*

State Key Laboratory of Electrical Insulation and Power Equipment, School of Electrical Engineering, Xi'an Jiaotong University, Xi'an 710049, PR China

\*Corresponding Author. E-mail: lzhangac@xjtu.edu.cn; cyh@mail.xjtu.edu.cn

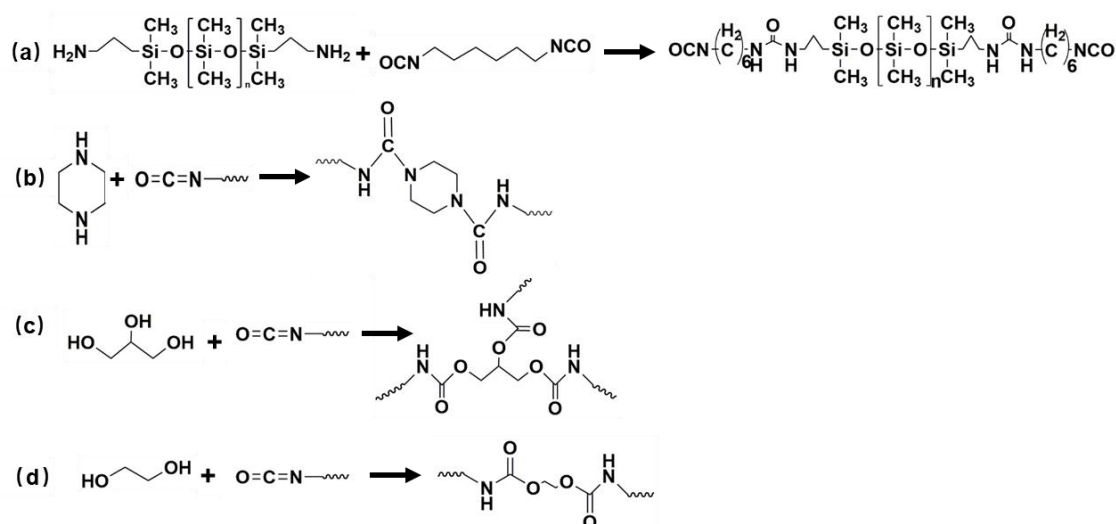

Fig. S1. The possible chemical reaction during PDMS-SPUA preparation.

#### Chemical structure of compound with hindered urea bond

Synthesis of hindered urea: 0.168 g HDI was added slowly into the solution of PA/acetone (0.086 g/2 g) in a beaker. The reaction was carried out 1 h at 50 °C until the white solid appeared. And then the solid was dried at 50 °C for 1 h under vacuum.

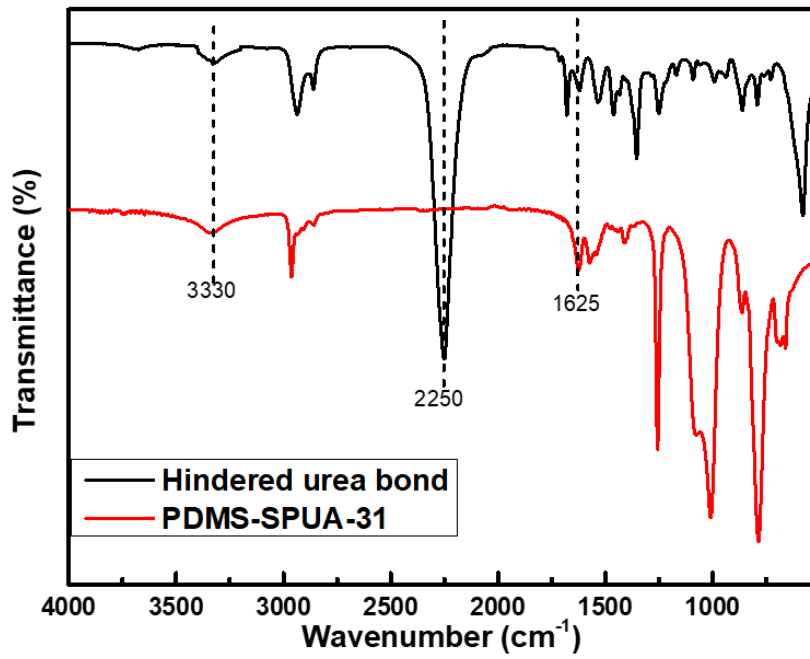

Fig. S2. FTIR spectra of compound with hindered urea bond and PDMS-SPUA-31.

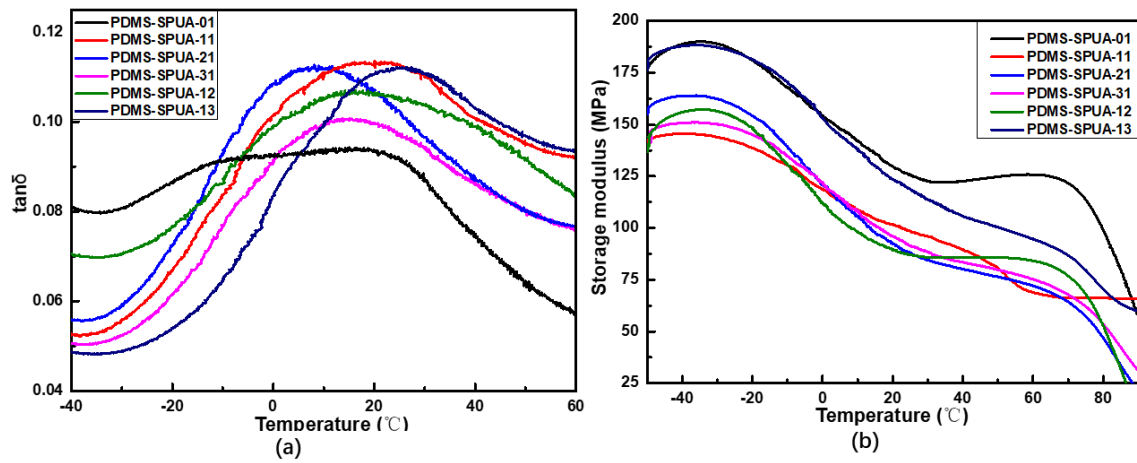

Fig. S3. (a)  $\tan \delta$  curves and (b) storage modulus curves of PDMS-SPUA-xx.

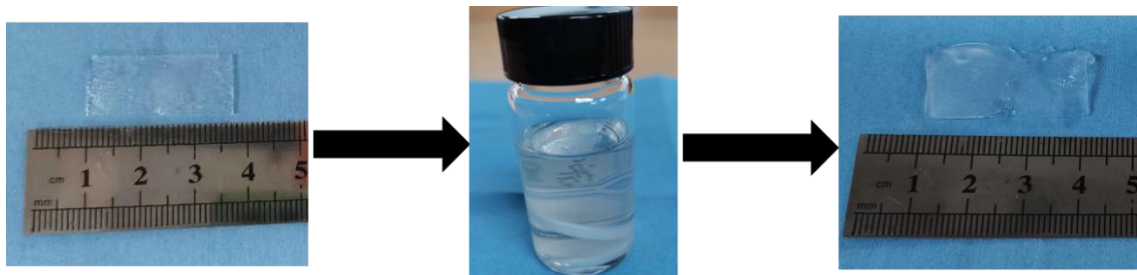

Fig. S4. Swelling test of samples, take PDMS-SPUA-21 as an example.

### Calculation of crosslink density

The rubber molecular chains are connected into a denser three-dimensional network structure as the cross-linking density increases according to the cross-linking network theory, which limits the movement of the molecular chains. Therefore, the smaller the deformation, the greater the modulus. According to the theory of rubber elasticity, the cross-linking density  $\nu_e$  can be calculated using Eq. (S1).

$$\nu_e = \frac{E}{3RT} \quad (\text{S1})$$

Whereby  $\nu_e$  represents cross-linking density (in  $\text{mol}\cdot\text{m}^{-3}$ ),  $E$  is storage modulus of rubber platform area above  $T_g$  (in 0.1Pa),  $R$  is the gas constant ( $R = 8.314 \text{ J}\cdot\text{mol}^{-1}\text{K}^{-1}$ ), and  $T$  is absolute temperature (in K). Table S1 gives the results of calculation.

Table S1. The crosslinking density and the mechanical properties of different samples

| Sample       | Crosslinking density               |                             |                                |                        |
|--------------|------------------------------------|-----------------------------|--------------------------------|------------------------|
|              | ( $\text{mol}\cdot\text{m}^{-3}$ ) | $\sigma$ (MPa) <sup>a</sup> | $\varepsilon$ (%) <sup>b</sup> | $E$ (MPa) <sup>c</sup> |
| PDMS-SPUA-01 | 151.00                             | $1.9 \pm 0.1$               | $79.4 \pm 3.6$                 | $69.9 \pm 3.4$         |
| PDMS-SPUA-11 | 93.20                              | $1.9 \pm 0.5$               | $155.8 \pm 24.8$               | $49.5 \pm 10.7$        |
| PDMS-SPUA-21 | 94.74                              | $2.0 \pm 0.4$               | $232.2 \pm 7.9$                | $51.9 \pm 15.9$        |
| PDMS-SPUA-31 | 95.78                              | $2.9 \pm 0.1$               | $297.7 \pm 1.1$                | $53.2 \pm 0.3$         |
| PDMS-SPUA-12 | 102.58                             | $2.9 \pm 0.1$               | $247.8 \pm 14.5$               | $55.3 \pm 1.2$         |
| PDMS-SPUA-13 | 108.18                             | $2.6 \pm 0.5$               | $225.2 \pm 21.2$               | $58.1 \pm 2.8$         |

<sup>a</sup>Maximum tensile strength. <sup>b</sup>Elongation at break. <sup>c</sup>Elastic modulus.

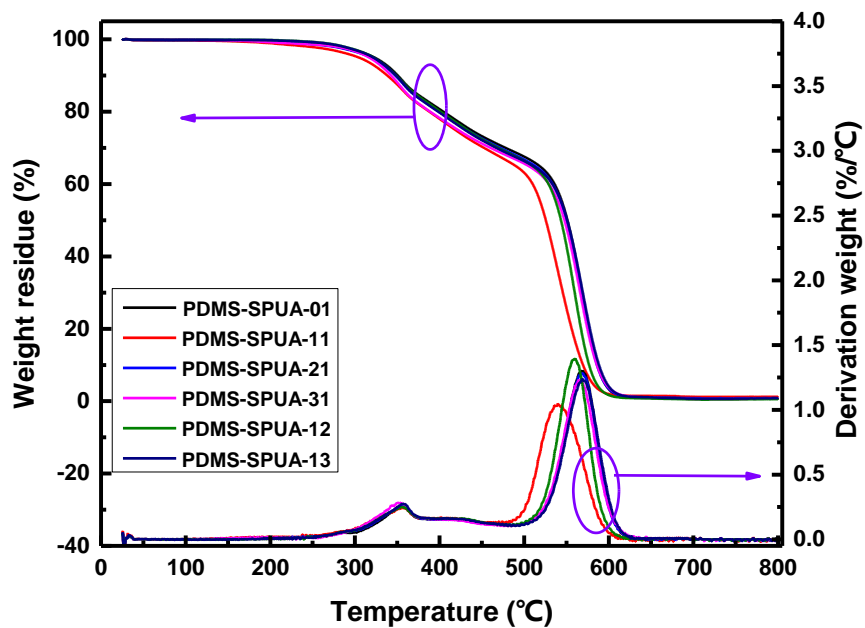

Fig. S5. TGA curves and DTG curves of PDMS-SPUA-xx.

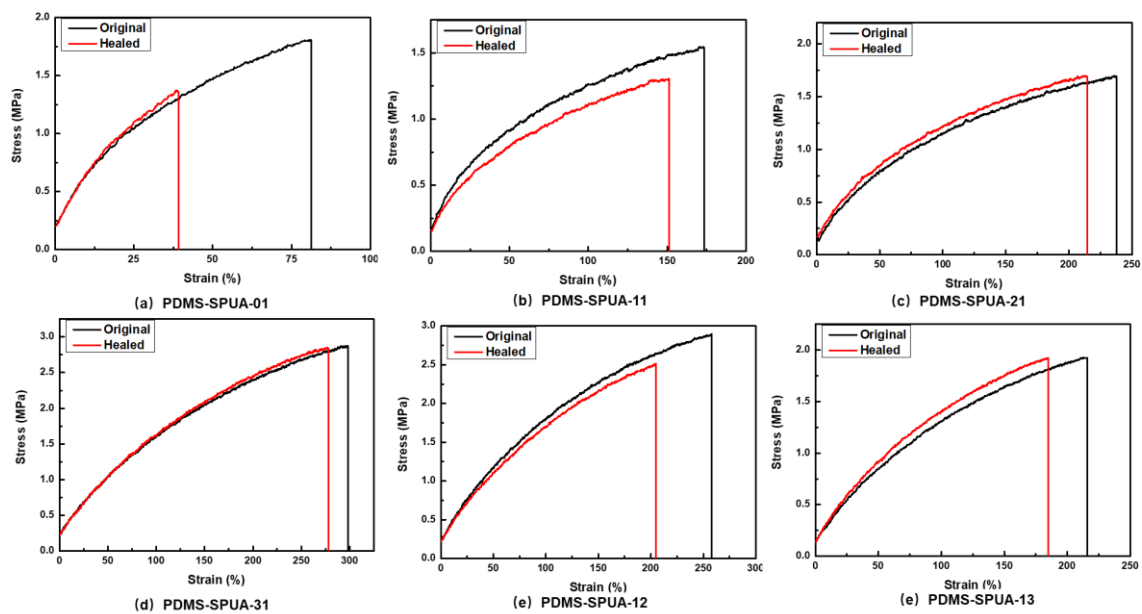

Fig. S6. Stress-strain curves of different samples before and after cutting healing.

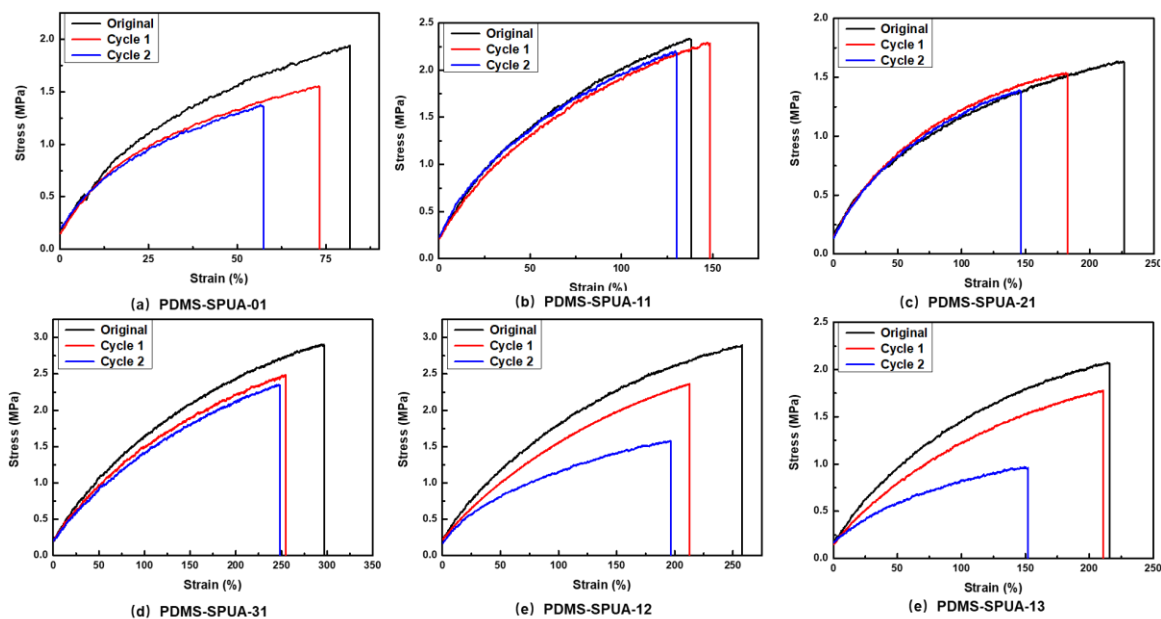

Fig. S7. Stress-strain curves of different samples before and after recycling.

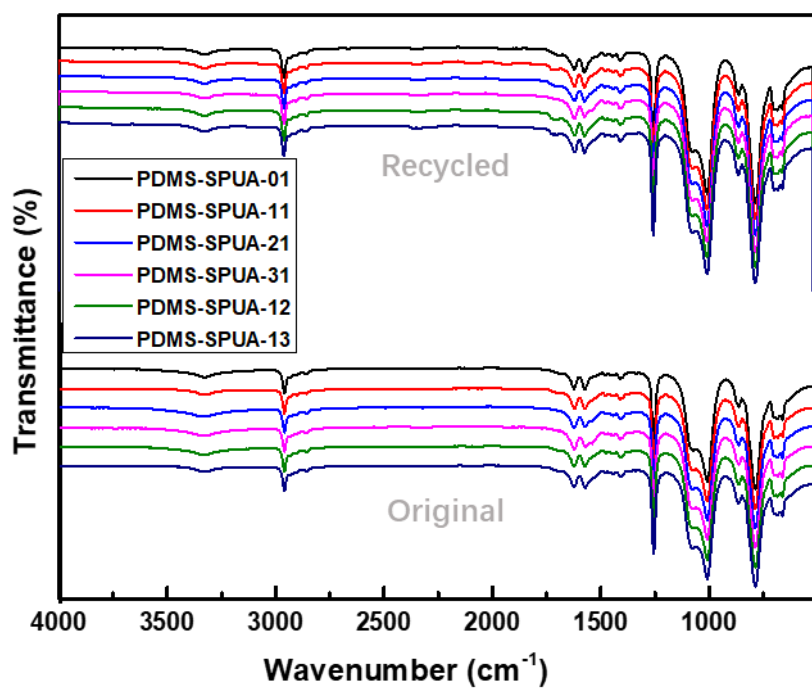

Fig. S8. FTIR spectra of the original and recycled PDMS-SPUA-xx samples.

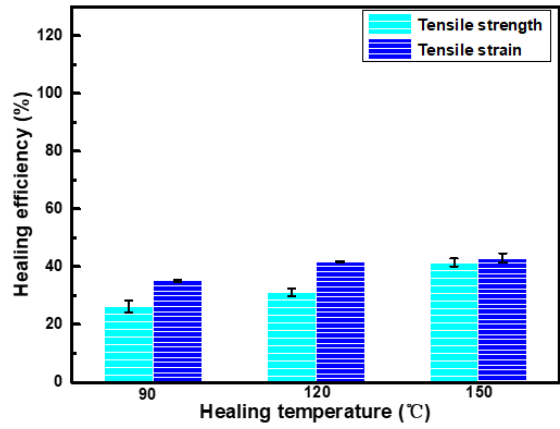

(a) PDMS-SPUA-01/graphene

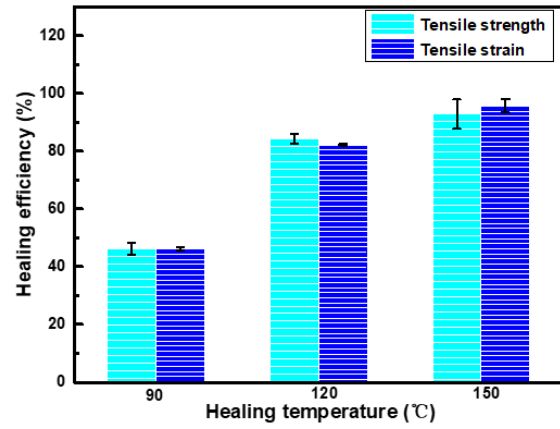

(a) PDMS-SPUA-31/graphene

Fig. S9. Cut-healing efficiency of PDMS-SPUA/graphene under different healing temperature.
